# Supplementary material for: Wide field light-sheet microscopy with lens-axicon controlled two-photon Bessel beam illumination
Source: PubMed Central journal article supplement (PMC8137944; doi:10.1038/s41467-021-23249-y), 2021-05-20
Supplement: 41467_2021_23249_MOESM3_ESM.pdf [file 41467_2021_23249_MOESM3_ESM.pdf]

## Description of Additional Supplementary Files

**Title: Supplementary Movie 1**

**Description:** Time course imaging of a FLT4-EGFP Medaka during 80–155 hpf in the dorsal view.

**Title: Supplementary Movie 2**

**Description:** Time course imaging of a FLT4-GFP Medaka during 80–155 hpf in the lateral view.

**Title: Supplementary Movie 3**

**Description:** Ca<sup>2+</sup> imaging of a Medaka embryo with GCaMP6f.

**Title: Supplementary Code**

**Description:** The MATLAB program package that performs a numerical integration of the lens-axicon triplet formula.
